# Supplementary material for: A micro-epidemiological analysis of febrile malaria in Coastal Kenya showing hotspots within hotspots
Source: eLife journal article supplement (doi:10.7554/elife.02130), 2014-04-24

Imposed scale: 8 km

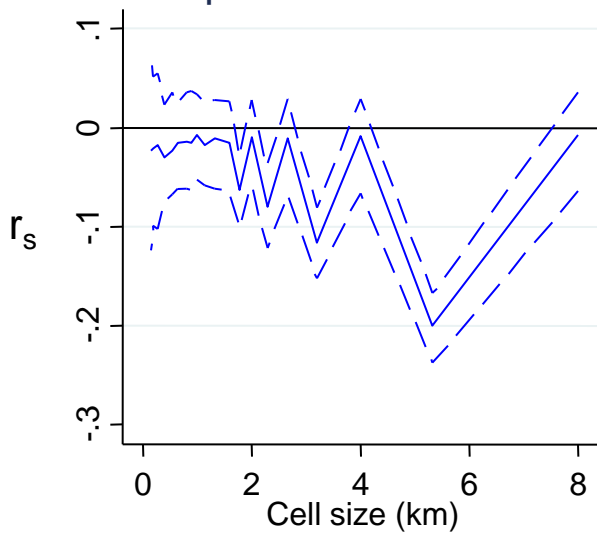

Imposed scale: 5.3 km

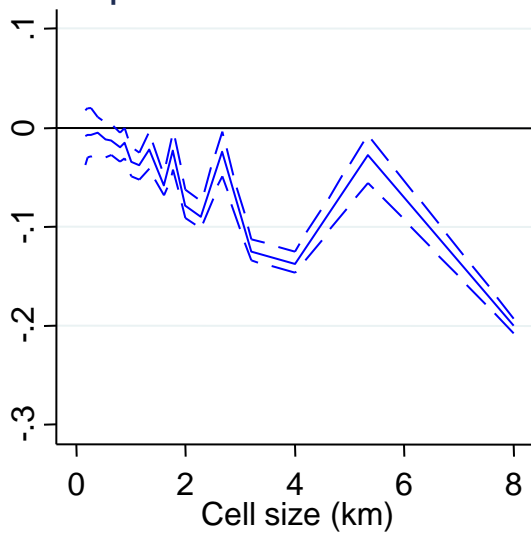

Imposed scale: 4 km

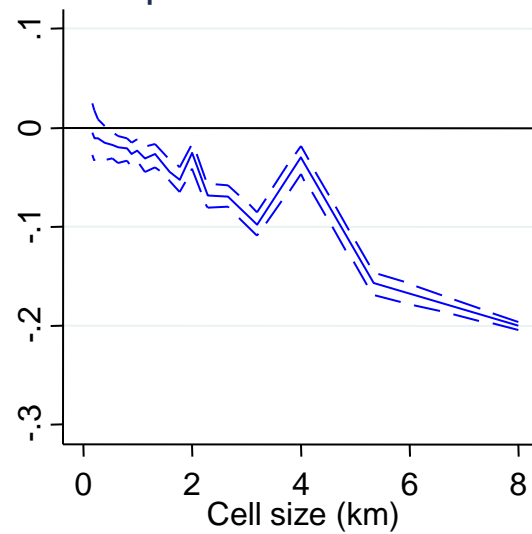

Imposed scale: 3.2 km

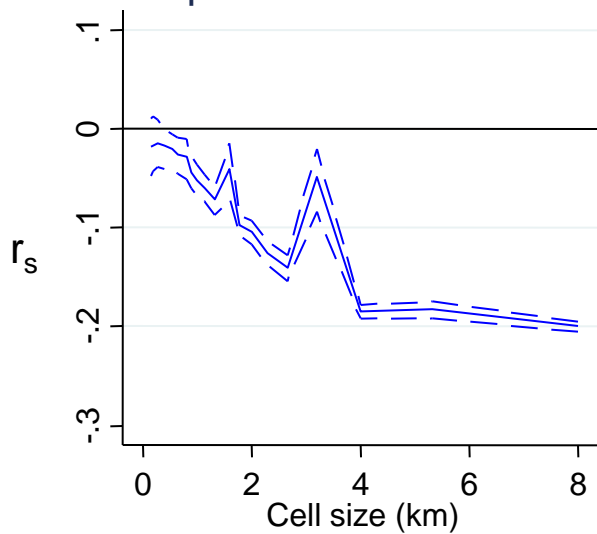

Imposed scale: 2.7 km

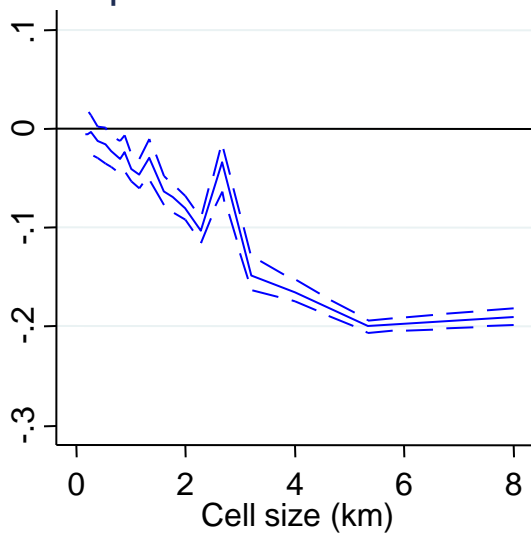

Imposed scale: 2 km

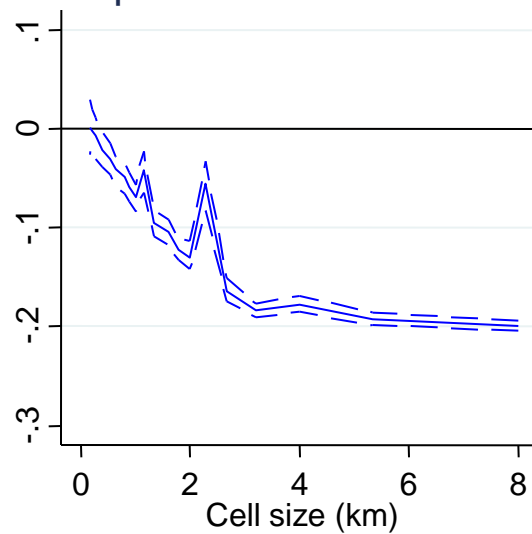

Supplement: supp [file elife_poa_e02130_Figure_1_figure_supplement_1.pdf › elife_poa_e02130_Figure_1_figure_supplement_1.pdf]
