# Supplementary material for: A micro-epidemiological analysis of febrile malaria in Coastal Kenya showing hotspots within hotspots
Source: eLife journal article supplement (doi:10.7554/elife.02130), 2014-04-24

Signal:Noise Ratio 4:1

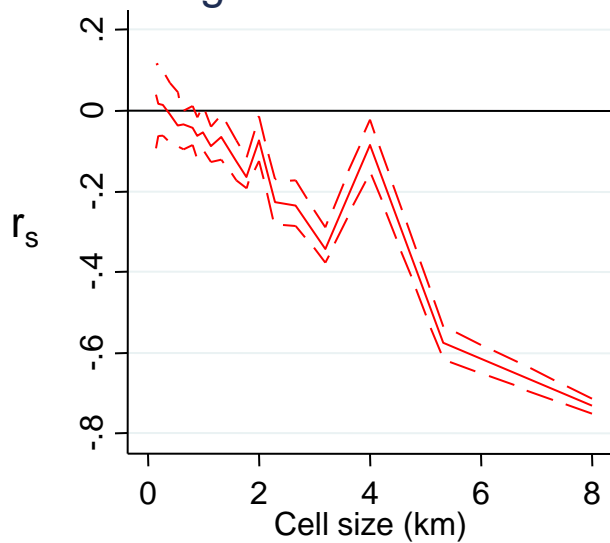

Signal:Noise Ratio 2:1

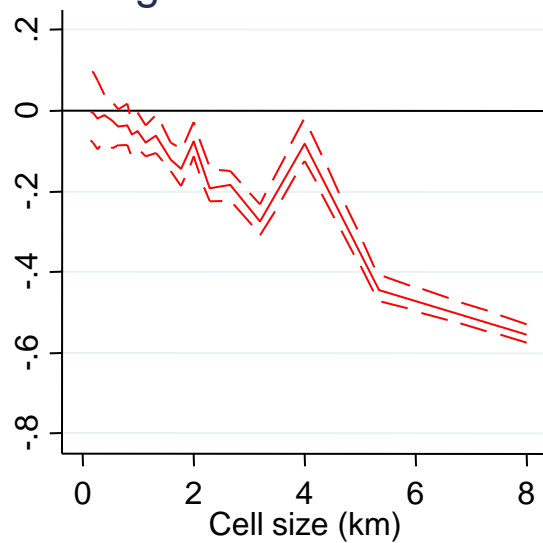

Signal:Noise Ratio 1:1

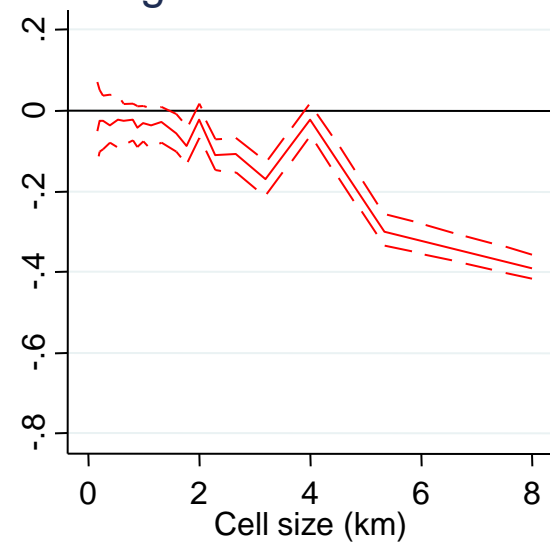

Signal:Noise Ratio: 1:2

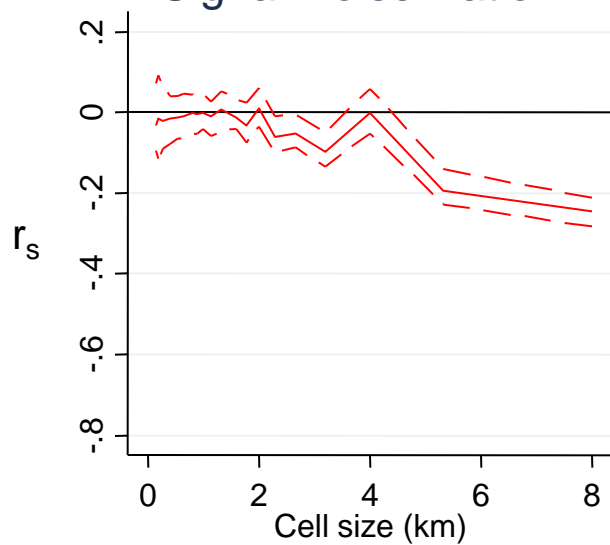

Signal:Noise Ratio: 1:4

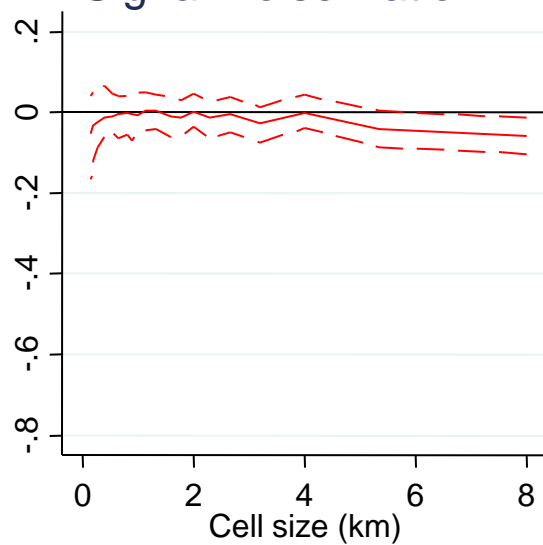

Signal:Noise Ratio: 1:8

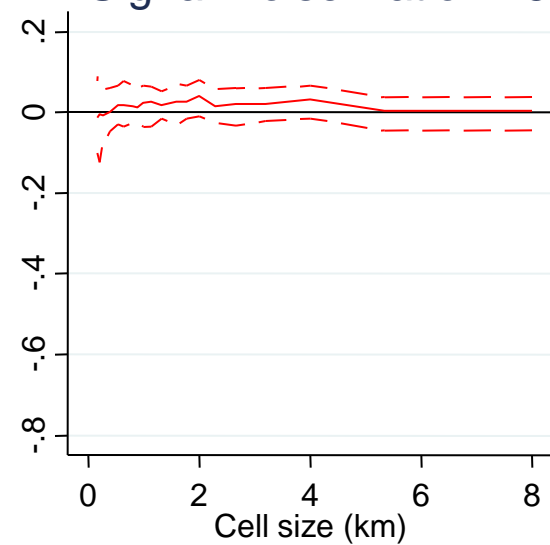

Supplement: supp [file elife_poa_e02130_Figure_1_figure_supplement_2.pdf › elife_poa_e02130_Figure_1_figure_supplement_2.pdf]
