# Supplementary figures and images for: A micro-epidemiological analysis of febrile malaria in Coastal Kenya showing hotspots within hotspots
Source: eLife journal article supplement (doi:10.7554/elife.02130), 2014-04-24

Gradient: 1%

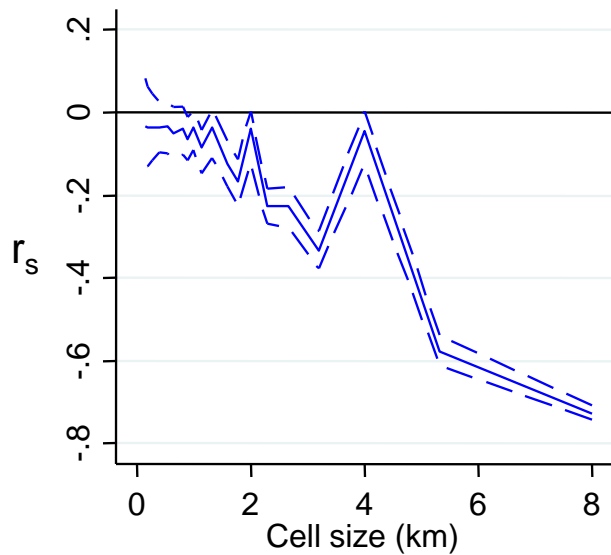

Gradient: 5%

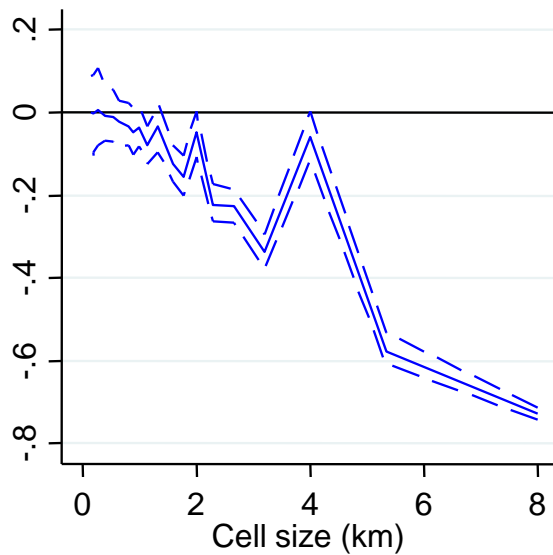

Gradient: 10%

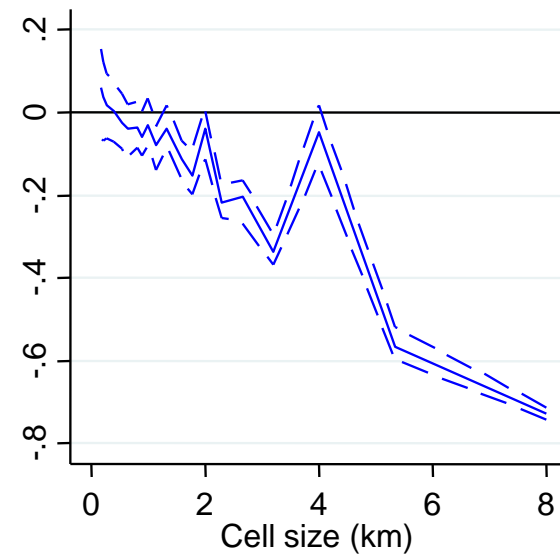

Gradient: 20%

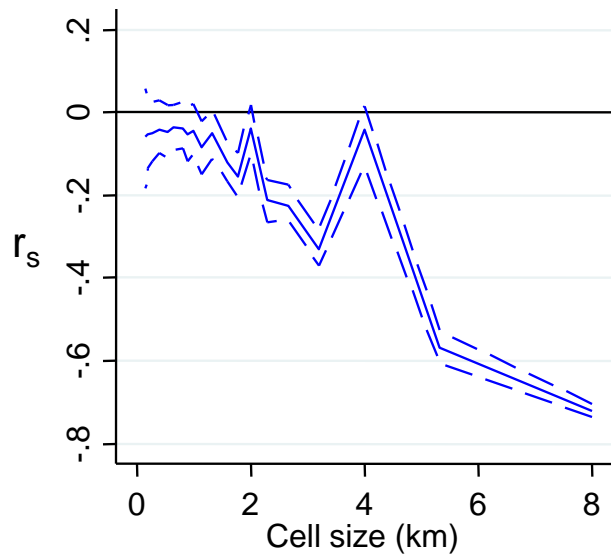

Gradient: 50%

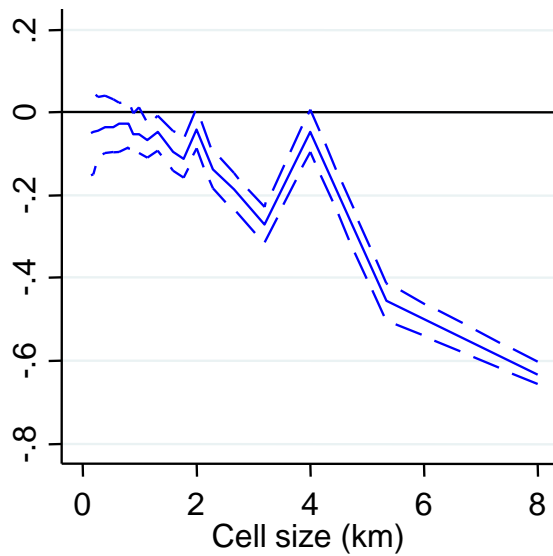

Gradient: 100%

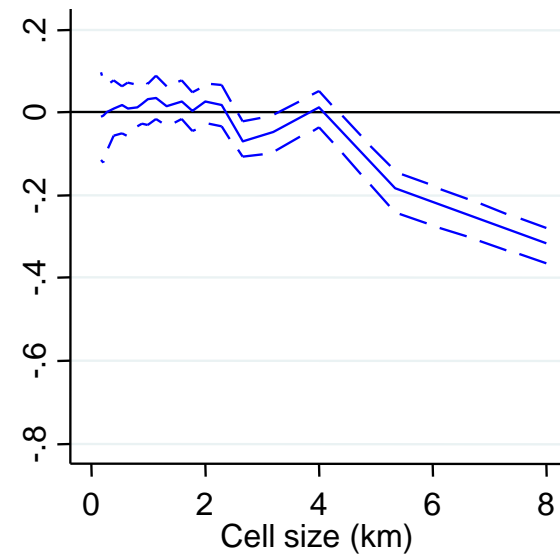

Supplement: supp [file elife_poa_e02130_Figure_1_figure_supplement_3.pdf › elife_poa_e02130_Figure_1_figure_supplement_3.pdf]

# Semi-variogram

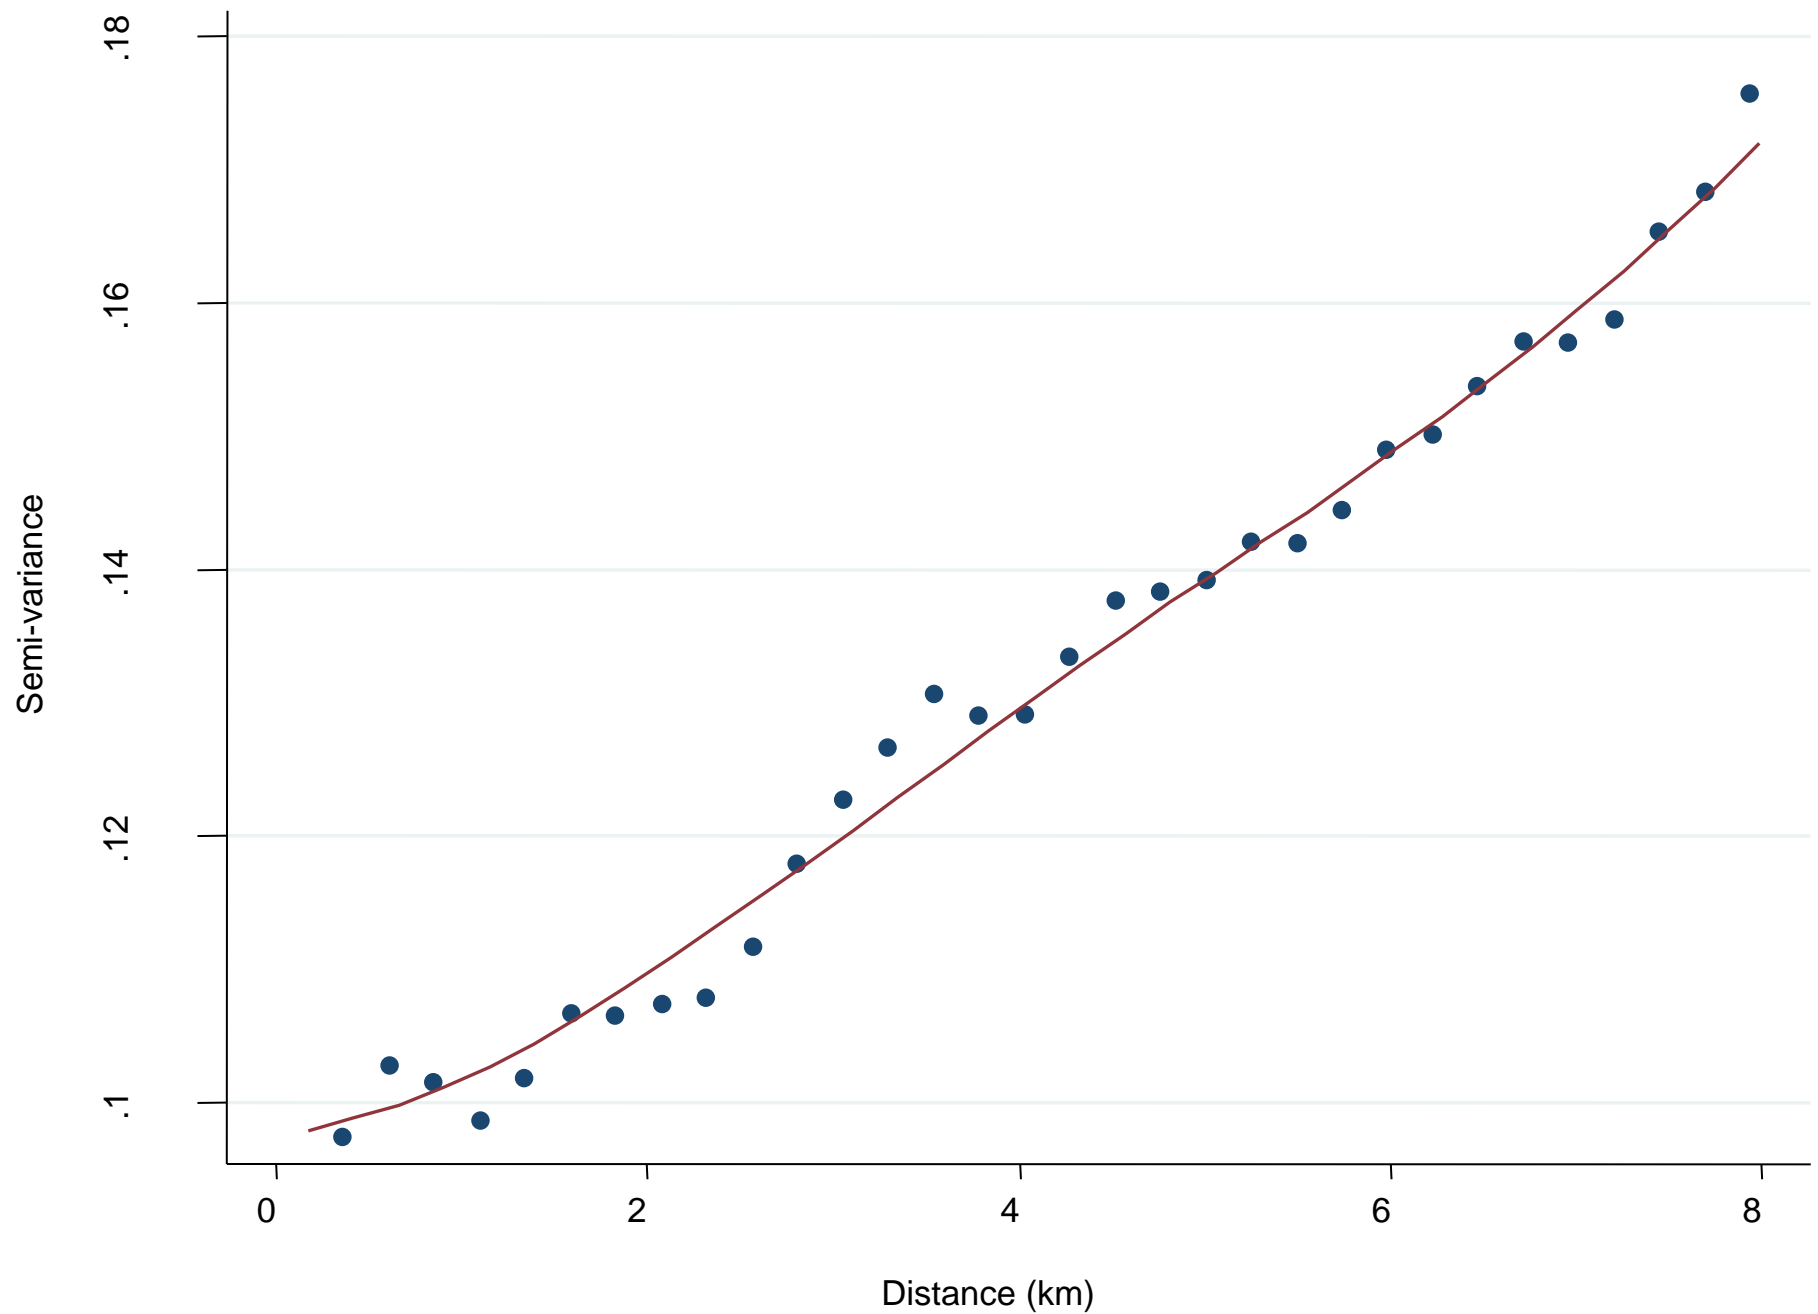

Supplement: supp [file elife_poa_e02130_Figure_2_figure_supplement_1.pdf › elife_poa_e02130_Figure_2_figure_supplement_1.pdf]

Log-log Plot of Semi-variogram

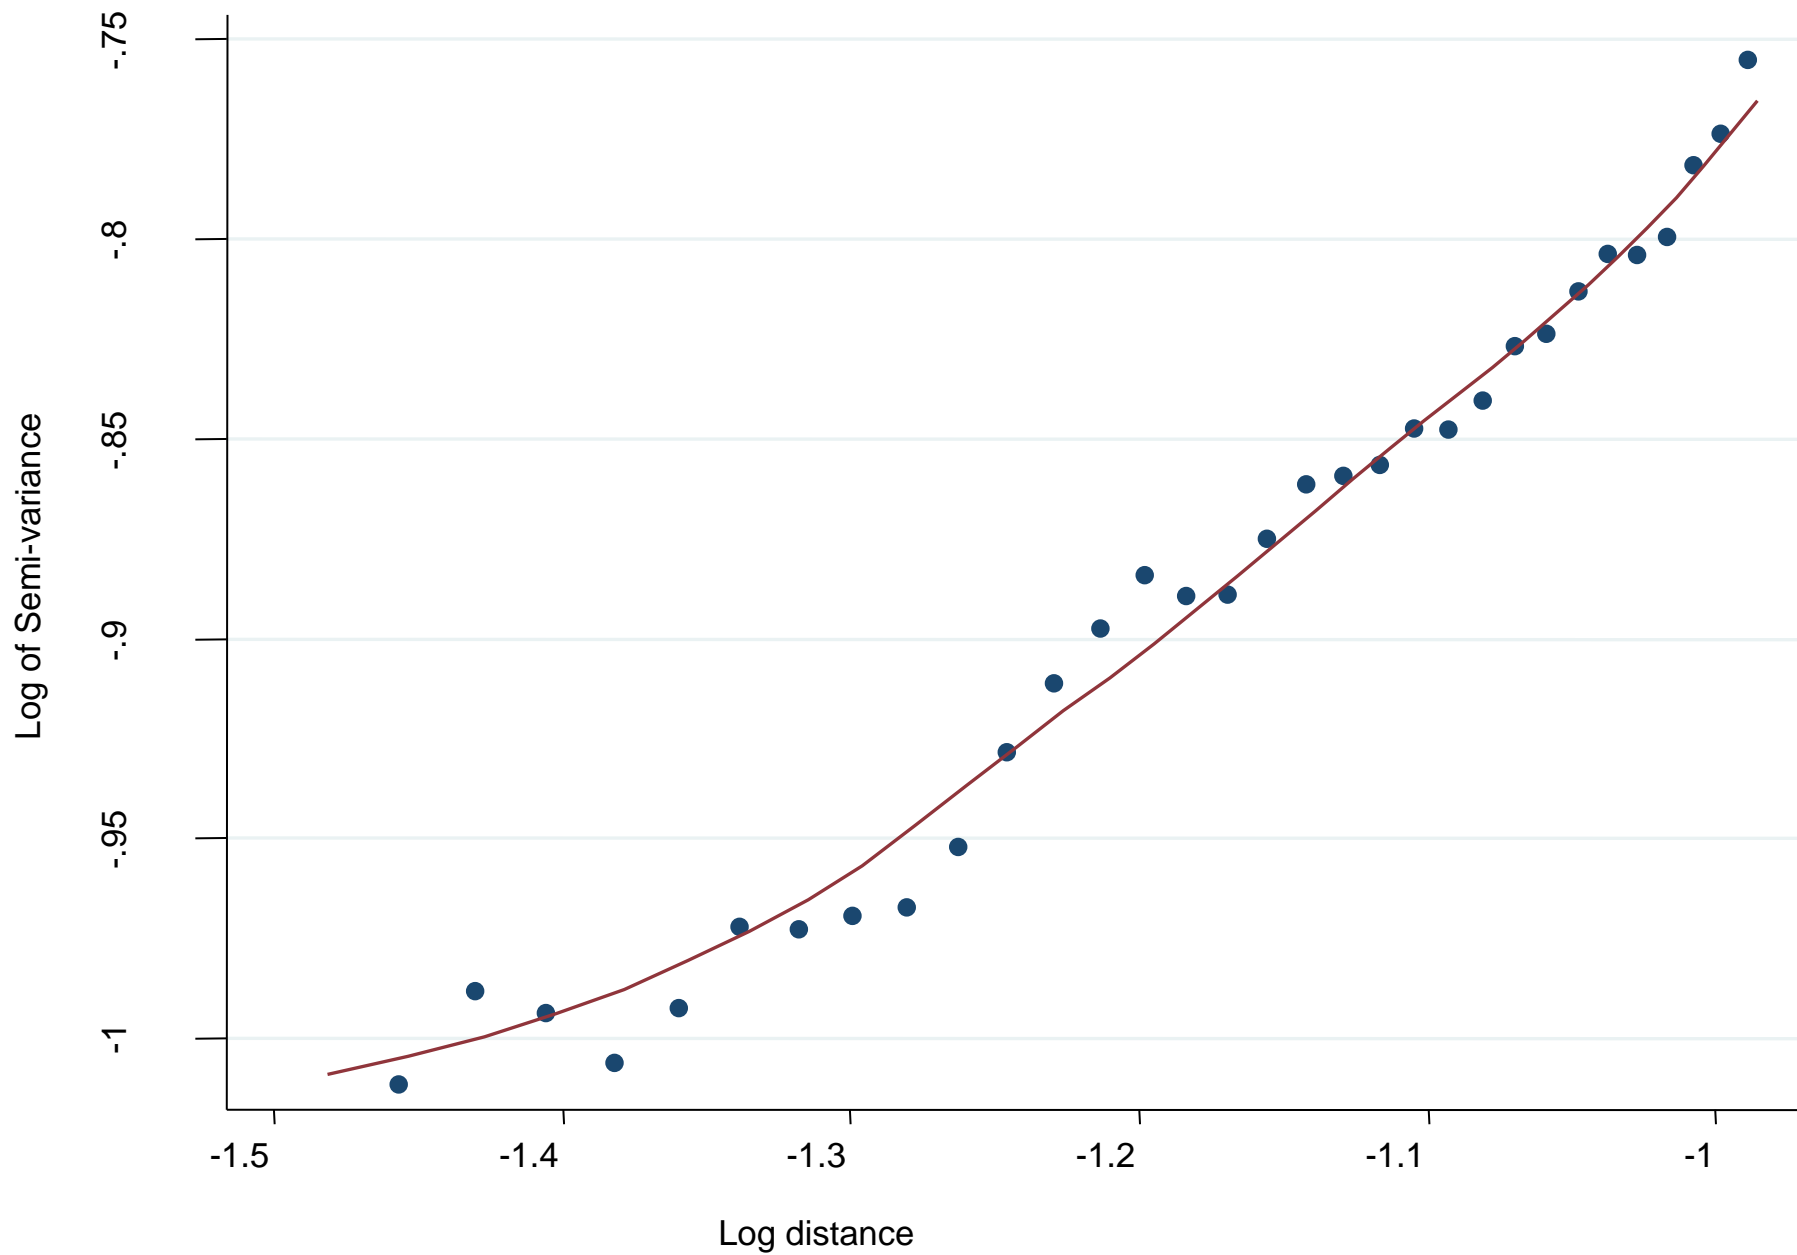

Supplement: supp [file elife_poa_e02130_Figure_2_figure_supplement_2.pdf › elife_poa_e02130_Figure_2_figure_supplement_2.pdf]
